# Supplementary material
Source: HighWire-hosted journal article supplement (https://bmjopen.bmj.com/content/14/8/e082159)
Supplement: inline-supplementary-material-3 [file inline-supplementary-material-3.pdf]

Supplemental Table2. Linear Regression Analysis of Factors Influencing Caregivers’ PHQ-9 scores

| Variable                             | Univariate Analysis      |              | Multivariable Analysis  |              |
|--------------------------------------|--------------------------|--------------|-------------------------|--------------|
|                                      | β (95% CI)               | P            | β (95% CI)              | P            |
| Caregiver age                        | 0.017(-0.983 to 1.017)   | 0.862        |                         |              |
| Number of children                   | 1.000(0.288 to 1.712)    | 0.163        |                         |              |
| Caregiver education                  | -0.193(-0.527 to 0.141)  | 0.564        |                         |              |
| Annual household income              | -0.895(-1.409 to -0.381) | 0.381        |                         |              |
| Child’s age                          | -0.157(-0.337 to 0.023)  | 0.387        |                         |              |
| Duration of disease                  | -0.005(-0.228 to -0.218) | 0.983        |                         |              |
| Number of previous treatment types   | 2.200(1.306 to 3.094)    | <b>0.015</b> | 1.382(-0.504 to 3.269)  | 0.149        |
| Number of lens subluxation surgeries | 0.947(0.250 to 1.644)    | 0.177        |                         |              |
| BCVA in better eye (LogMAR)          | 12.266(8.868 to 15.664)  | <b>0.001</b> | 11.782(5.039 to 18.524) | <b>0.001</b> |
