# Supplementary material
Source: HighWire-hosted journal article supplement (https://bmjopen.bmj.com/content/14/8/e082159)
Supplement: inline-supplementary-material-4 [file inline-supplementary-material-4.pdf]

**Supplemental Table3. Linear Regression Analysis of Factors Influencing Caregivers' GAD-7 scores**

| Variable                             | Univariate Analysis     |              | Multivariable Analysis |              |
|--------------------------------------|-------------------------|--------------|------------------------|--------------|
|                                      | $\beta$ (95% CI)        | <i>P</i>     | $\beta$ (95% CI)       | <i>P</i>     |
| Caregiver age                        | 0.027(-0.134 to 0.189)  | 0.739        |                        |              |
| Number of children                   | 0.998(-0.150 to 2.145)  | <b>0.088</b> | 0.402(-0.877 to 1.682) | 0.533        |
| Caregiver education                  | -0.131(-0.671 to 0.409) | 0.631        |                        |              |
| Annual household income              | -0.543(-1.379 to 0.294) | 0.202        |                        |              |
| Child's age                          | -0.068(-0.361 to 0.225) | 0.646        |                        |              |
| Duration of disease                  | 0.034(-0.326 to 0.395)  | 0.850        |                        |              |
| Number of previous treatment types   | 1.564(0.107 to 3.020)   | <b>0.036</b> | 0.974(-0.629 to 2.576) | 0.230        |
| Number of lens subluxation surgeries | 0.671(-0.459 to 1.801)  | 0.242        |                        |              |
| BCVA in better eye (LogMAR)          | 10.232(4.698 to 15.765) | <b>0.000</b> | 9.249(3.267 to 15.230) | <b>0.003</b> |
