# Supplementary material
Source: HighWire-hosted journal article supplement (https://bmjopen.bmj.com/content/14/8/e082159)
Supplement: inline-supplementary-material-5 [file inline-supplementary-material-5.pdf]

**Supplemental Table4. Comparison of questionnaire scores between caregivers of CEL children without and with high myopia**

|                     | Non-high myopia<br>(n=83) | High myopia<br>(n=25) | <i>P</i>           |
|---------------------|---------------------------|-----------------------|--------------------|
| <b>PHQ-9 scores</b> | 5.8 ± 6.5 (0-25)          | 4.8 ± 6.4 (0-24)      | 0.457 <sup>a</sup> |
| <b>GAD-7 scores</b> | 4.9 ± 5.1 (0-21)          | 4.9 ± 5.8 (0-21)      | 0.838 <sup>a</sup> |

PHQ-9 and GAD-7 scores are mean ± standard deviation (range)

<sup>a</sup>Mann-Whitney U test
